# Supplementary material
Source: Research Square preprint supplement (doi:10.21203/rs.3.rs-9403735/v1)
Supplement: Supplementary file 1 [file 0631f2a2279f0fa5afd0f500.pdf]

## Supplementary figure legends

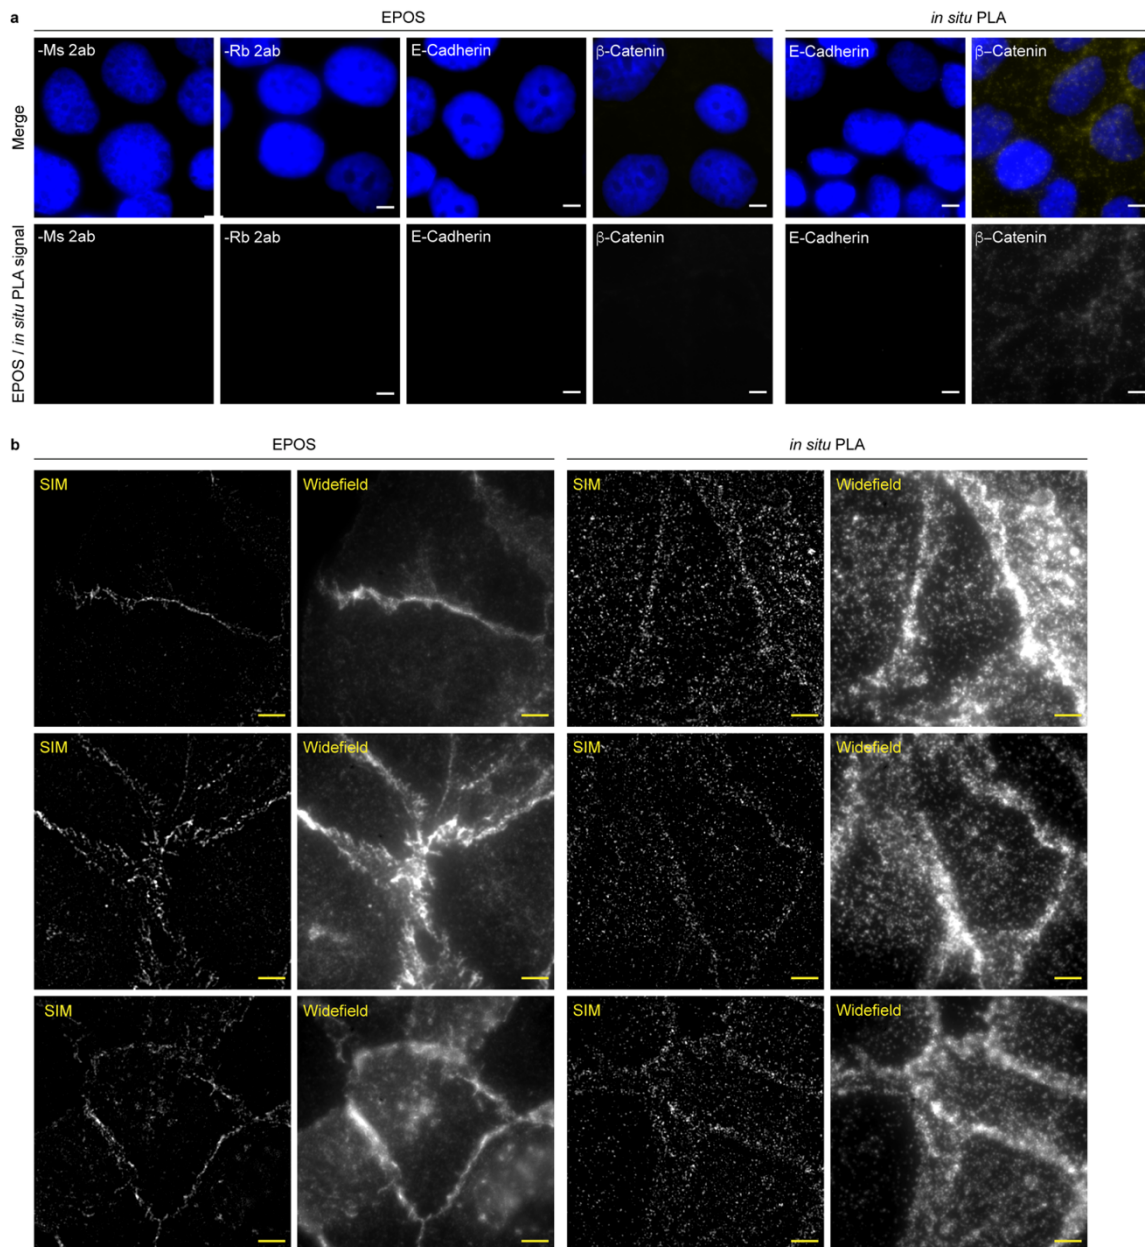

**Supplementary figure 1:** a) Technical controls, omitting proximity probes (prox probes) or primary antibodies. Omitting the anti-mouse prox probe (-Ms 2ab) or the anti-rabbit prox probe (-Rb 2ab) totally abolished all signals. When only one primary antibody was used, with both prox probes present, no background was detected in both EPOS and *in situ* PLA, except when only the rabbit anti- $\beta$ -Catenin primary antibody was used (i.e. the mouse anti-E-cadherin primary antibody was omitted). b) E-cadherin and  $\beta$ -catenin interactions in HaCaT cells visualised with EPOS or *in situ* PLA imaged with structured illumination microscopy (SIM) and super-resolution widefield microscopy. The EPOS and *in situ* PLA signals are shown in yellow, and Hoechst 33342 nuclear staining is shown in blue in the merged images. The scale bar is 5  $\mu$ m.

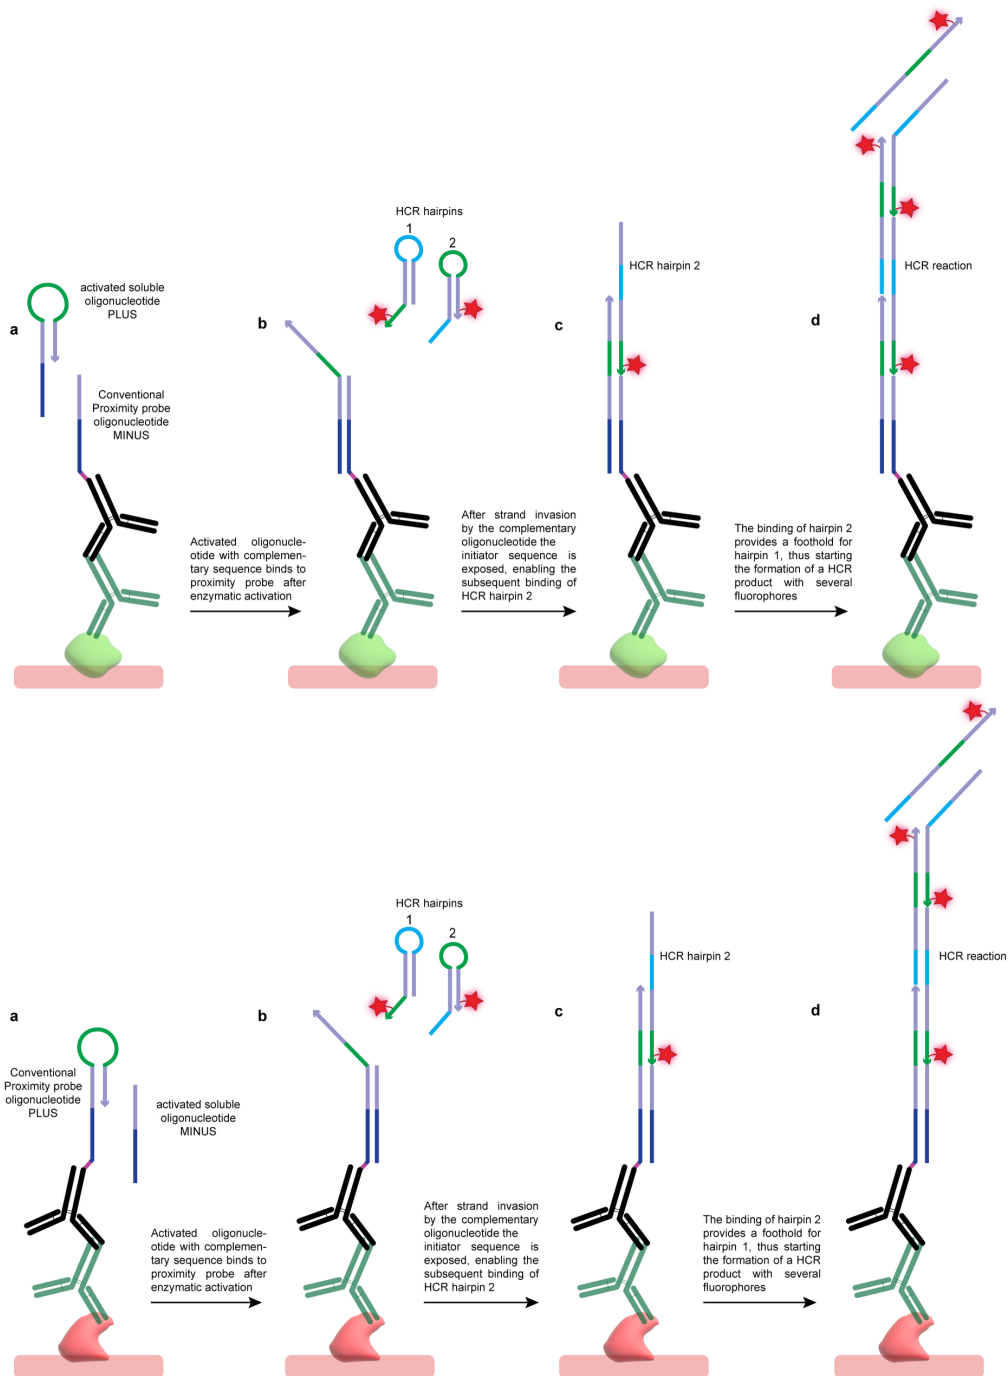

**Supplementary Figure 2: Schematic representation of the EPOS method utilizing an activated soluble oligonucleotide PLUS or an activated soluble oligonucleotide MINUS to initiate an HCR. a)** Activated proximity probes (prox probes) after digestion with uracil-DNA glycosylase (UDG) and endonuclease IV (EndoIV) are incubated with the corresponding activated soluble oligonucleotide MINUS or activated soluble oligonucleotide PLUS. **b)** The oligonucleotide hybridizes to the prox probe and exposes the initiator sequence. **c)** The exposed initiator sequence hybridizes to and invades HCR hairpin 2, **d)** which templates an HCR reaction.

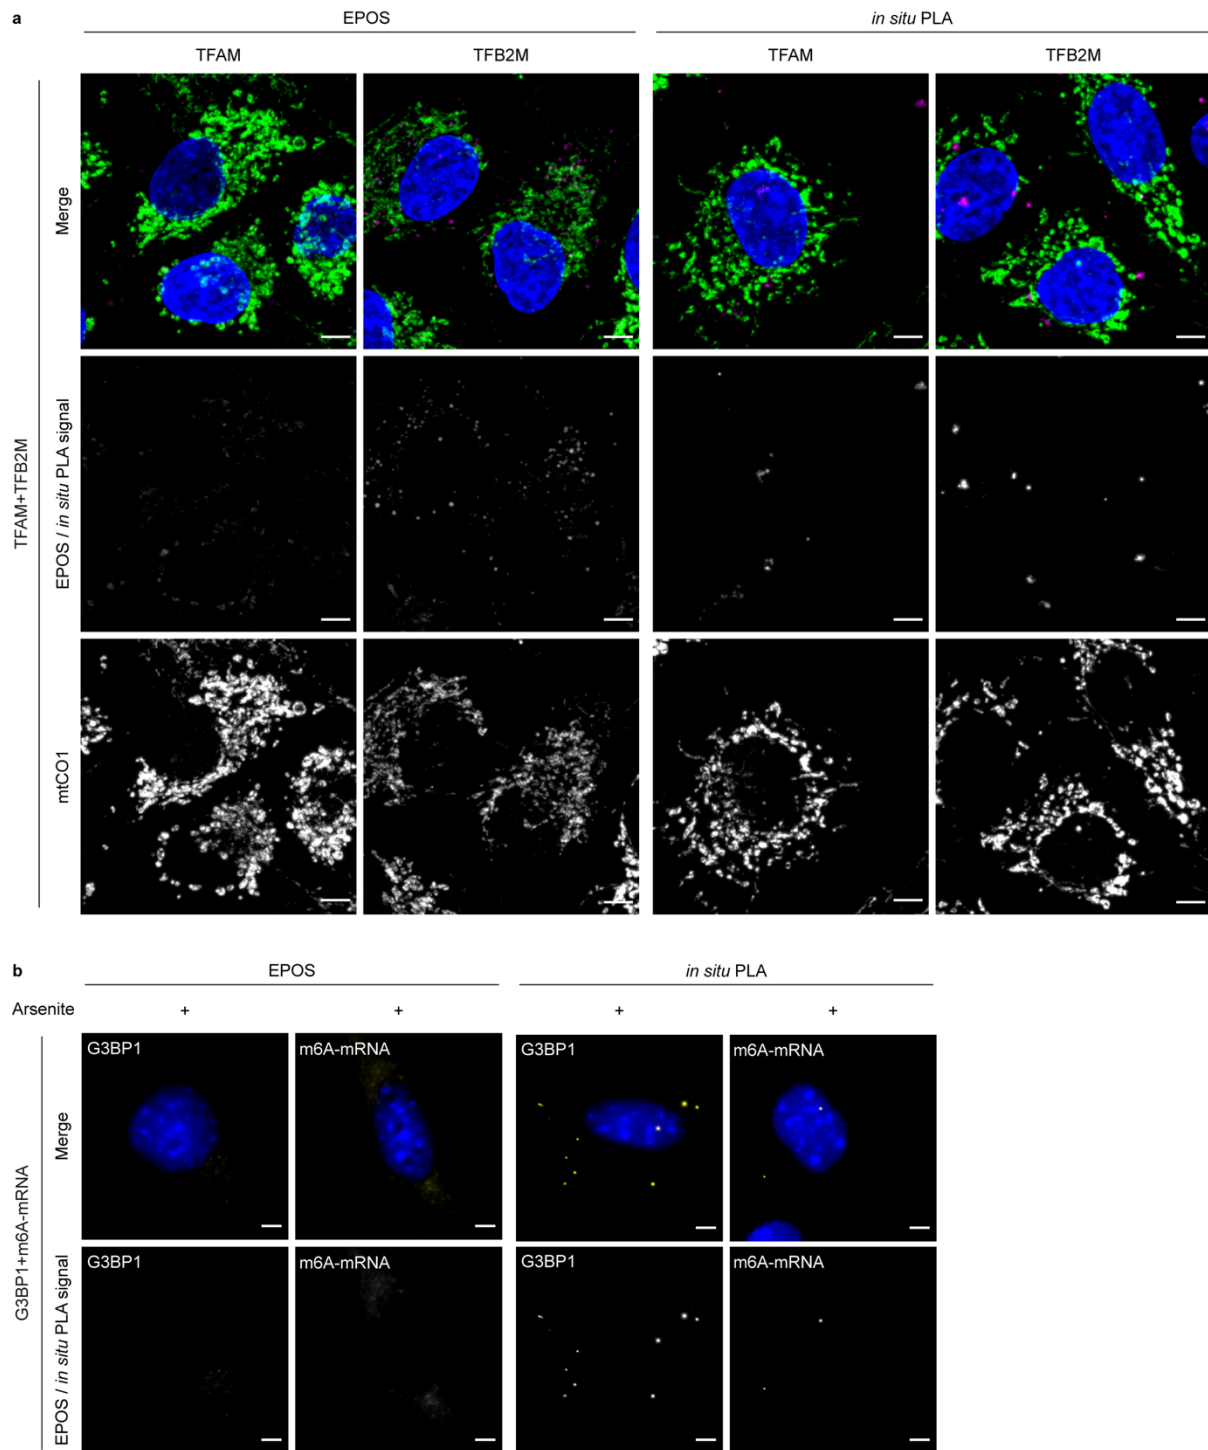

**Supplementary figure 3:** Technical controls omitting primary antibodies against a) TFAM or TFB2M in A549 lung adenocarcinoma cells and b) G3BP1 or m6A-mRNA interactions in HT22 mouse hippocampal neuronal cells after arsenite treatment. The signal is shown in magenta (a) or yellow (b), Alexa Fluor® 488 conjugated anti-MTCO1 antibody (Mitochondria, green) and Hoechst33342 staining of nuclei is shown in blue in the merged images. The scale bar is 5  $\mu$ m.

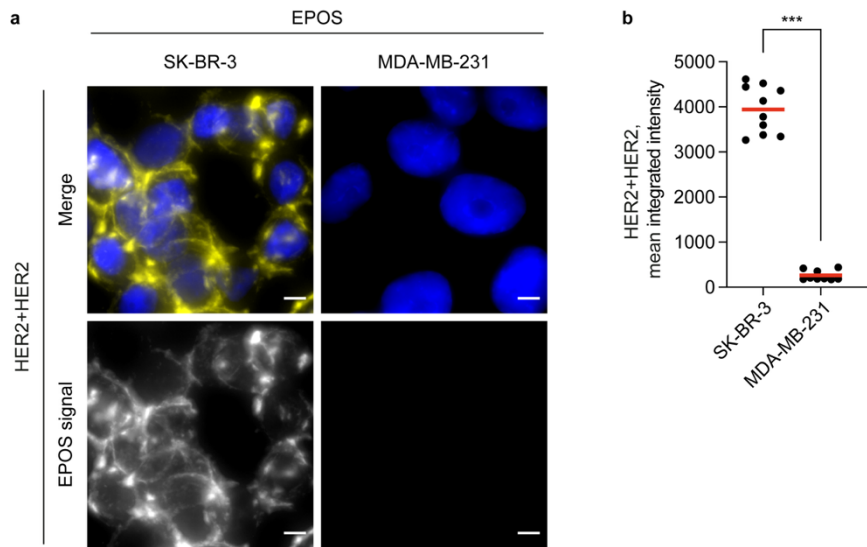

**Supplementary figure 4:** a) Detection of HER2 homodimerization with detection probes conjugated to sdAbs in SK-BR-3 and MDA-MB-231 cells. b) quantification of the EPOS staining in (a). The EPOS signals are shown in yellow, and Hoechst 33342 nuclear staining is shown in blue in the merged images. The scale bar is 5  $\mu$ m. Statistical analysis was performed using the Mann–Whitney test.  $n= 3$  experiments. Each dot represent an image frame, mean values per cell, \*\*\*= $p<0.005$ .

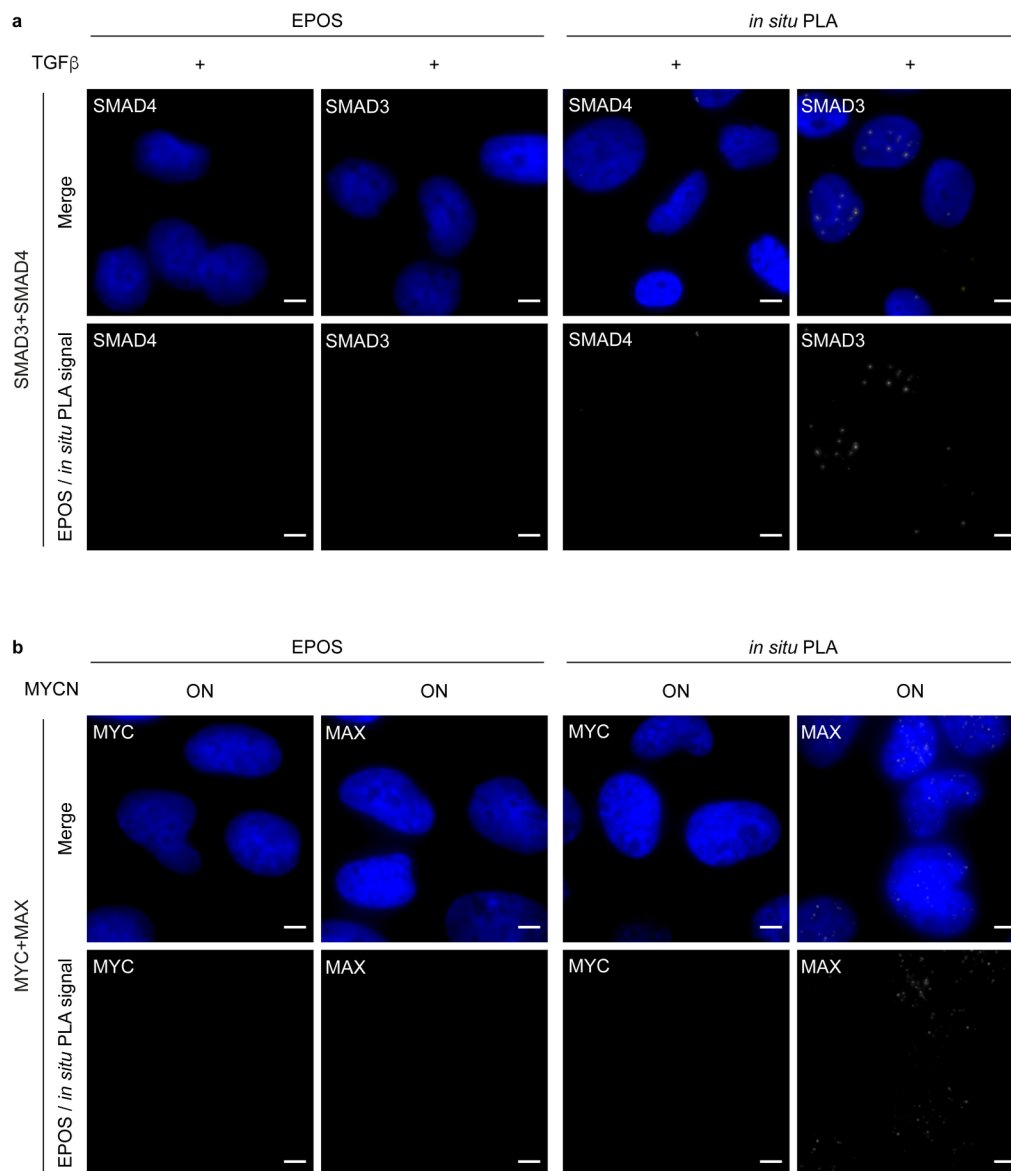

**Supplementary figure 5:** Technical controls omitting primary antibodies against a) SMAD3 or SMAD4 after the cells were stimulated with 5 ng/ml TGF-β in MDA-MB-231 breast cancer cells and b) MYCN or MAX in Tet21N neuroblastoma cells in the absence of doxycyclin (MYCN on). Omission of any primary antibody results in no signal with EPOS, while *in situ* PLA produces a signal even in the absence of the SMAD4 or the MYC antibody. The EPOS and *in situ* PLA signals are shown in yellow, and Hoechst 33342 nuclear staining is shown in blue in the merged images. The scale bar is 5 μm.

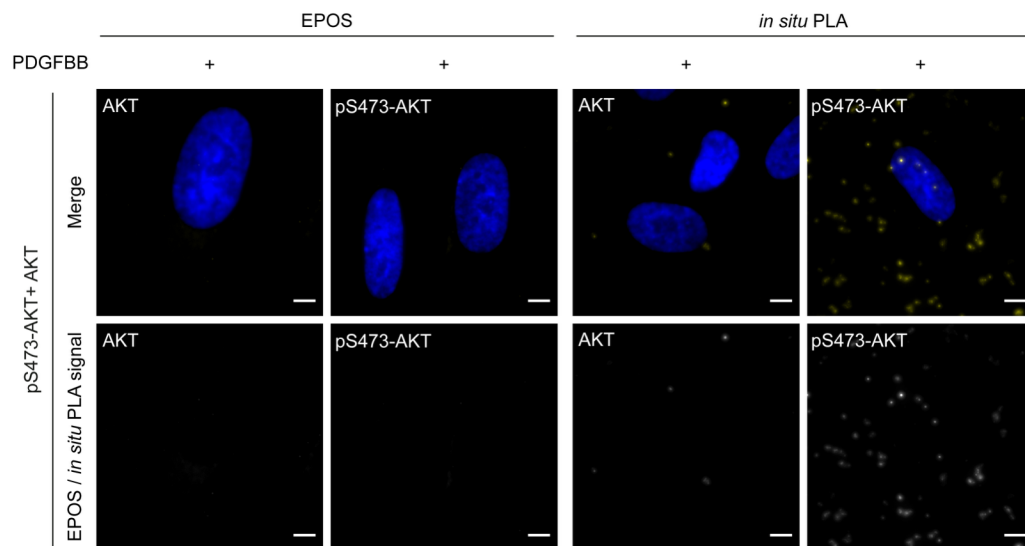

**Supplementary figure 6:** Technical controls omitting primary antibodies against phosphorylation on serine 473 (pS473-AKT) or total AKT after the cells were stimulated with 20 ng/ml PDGF-BB for 15 minutes. Omission of any primary antibody results in no signal with EPOS, while *in situ* PLA produces a signal even in the absence of the total AKT antibody. The EPOS and *in situ* PLA signals are shown in yellow, and Hoechst 33342 nuclear staining is shown in blue in the merged images. The scale bar is 5  $\mu$ m.

## Supplemental Tables

**Supplemental Table 1:** Oligonucleotides used

| Oligo name                                   | 5'→3'                                                                        | Vendor |
|----------------------------------------------|------------------------------------------------------------------------------|--------|
| Proximity probe oligonucleotide MINUS        | GCACUUGACUCGUAGCCCUUACUCCCUUUUUGGGAGTAAGG<br>GCTACGAGTCAAGTGCAAAAA-Azide     | QDS    |
| Proximity probe oligonucleotide MINUS part 1 | GCACUUGACUCGUAGCCCUUACUCCCUUUUUGGGAGTAAGG                                    | IDT    |
| Proximity probe oligonucleotide MINUS part 2 | Phosphate-GCTACGAGTCAAGTGCAAAAA-Azide                                        | IDT    |
| Proximity probe oligonucleotide PLUS         | Azide-AAAAAGCACTTGACTCGTAGCCCT<br>TACTCCCTGTGATGGGAGTAAGGGCUAUGAGUCAAGUGCUUU | QDS    |
| Proximity probe oligonucleotide PLUS part 1  | Azide-AAAAAGCACTTGACTCGTAGCCCT                                               | IDT    |
| Proximity probe oligonucleotide PLUS part 2  | Phosphate-<br>TACTCCCTGTGATGGGAGTAAGGGCUAUGAGUCAAGUGCUUU                     | IDT    |
| HCR-hairpin 1                                | GGAATTGCCCTTACTCCCTGTGATGGGAGTAAGGGC-TexasRed                                | IDT    |
| HCR-hairpin 2                                | GGGAGTAAGGGCAATTCGCCCTTACTCCCATCACA-TexasRed                                 | IDT    |
| Activated soluble oligonucleotide MINUS      | GGGAGTAAGGGCTACGAGTCAAGTGC                                                   | IDT    |
| Activated soluble oligonucleotide PLUS       | GCACTTGACTCGTAGCCCTTACTCCCTGTGATGGGAGTAAGGGC                                 | IDT    |

**Supplemental Table 2: Primary antibodies used**

| <b>Target</b>    | <b>Host</b> | <b>Dilution</b> | <b>Product number</b> | <b>Company</b>               |
|------------------|-------------|-----------------|-----------------------|------------------------------|
| AKT              | Mouse       | 1:100           | 2920                  | Cell Signaling Technology    |
| AKT (pS473)      | Rabbit      | 1:50            | 4060                  | Cell Signaling Technology    |
| $\beta$ -catenin | Rabbit      | 1:100           | 8480                  | Cell Signaling Technology    |
| Clathrin         | Mouse       | 1:200           | ab2731                | Abcam                        |
| Clathrin         | Rabbit      | 1:10 -> 1:7290  | 4796                  | Cell Signaling Technology    |
| E-cadherin       | Mouse       | 1:100           | 610182                | BD Transduction Laboratories |
| G3BP1            | Rabbit      | 1:500           | 45656                 | Cell Signaling Technology    |
| Her2             | Llama       | 2 $\mu$ g/ml    | Q17                   | QVQ                          |
| m6A-mRNA         | Mouse       | 1:500           | ab208577              | Abcam                        |
| MAX              | Rabbit      | 1:400           | ab101271              | Abcam                        |
| MYCN             | Mouse       | 1:400           | B8.4.B                | Santa Cruz Biotechnology     |
| SMAD3            | Rabbit      | 1:100           | 9523                  | Cell Signaling Technology    |
| SMAD4            | Mouse       | 1:100           | sc-7966               | Santa Cruz Biotechnology     |
| TFAM             | Mouse       | 1:200           | sc-376672             | Santa Cruz Biotechnology     |
| TFB2M            | Goat        | 1:200           | 46 481                | Biozol                       |
